# Supplementary material
Source: HighWire-hosted journal article supplement (https://jmg.bmj.com/content/60/8/801)
Supplement: inline-supplementary-material-1 [file inline-supplementary-material-1.pdf]

## Supplementary Methods

### Chromosome breakage analysis (CBA)

CBA was performed by culturing T-cells from 0.5 mL whole blood in 4.5 mL of RPMI 1640 containing 10% fetal bovine serum (FBS) and 60 µg/mL phytohemagglutinin (Thermo Fisher Scientific) at 37°C/5% CO<sub>2</sub>. After 24 h, MMC was added at 50 and 100 ng/mL in the culture, and after 72 h, the cells were arrested at the metaphase by treatment with 0.02 µg/mL colcemid for 1 h. A total of 40 well-spread metaphases of the cells with normal ploidy were analysed. Ambiguous structures were excluded from the analysis. A conservative linear discriminant function that provided 100% sensitivity and 100% specificity was used to calculate the CBA scores.<sup>71</sup>

### Isolation and culture of human dermal fibroblasts

Human dermal fibroblasts were isolated and cultured using a previously described protocol.<sup>72</sup> In brief, 1 mm<sup>3</sup> skin biopsies obtained from the patients were washed with phosphate-buffered saline (PBS; HyClone) and incubated overnight at 37°C/5% CO<sub>2</sub> in a 15 mL conical flask with 1 mL of a skin biopsy digestion medium containing DMEM with 20% FBS, 0.25% collagenase type I (ThermoFisher Scientific), 0.05% DNase I (Merck), and antibiotics (100 U/mL penicillin and 100 µg/mL streptomycin). The tube was briefly vortexed the next day, and 7 mL of DMEM containing 20% FBS was added. The dissociated cells were then plated in a T25 culture flask and incubated for 3 days at 37°C (5% CO<sub>2</sub>). The medium was replaced on the fourth day with DMEM containing 10% FBS and antibiotics. The cells were cultured with a media change on alternate days until they reached approximately 80% confluency. Cells were then passaged at 1:4 ratio using 0.05% trypsin-EDTA (Thermo Fisher Scientific). After two passages, the cells were cryopreserved.

### FANCD2-Ub analysis in the PB cells and dermal fibroblasts

PBMNCs isolated from 5 mL of the blood sample by density gradient separation using Ficoll-Hypaque solution (Hyclone) were cultured in 5 mL of RPMI medium containing 10% FBS and 60 µg/mL phytohemagglutinin. After 4 days of culture, whole-cell lysates were prepared for western blot analysis. Fibroblasts were isolated from patients' skin biopsies for FANCD2 ubiquitination analysis (refer to supplementary methods). 2×10<sup>6</sup> fibroblasts were treated with 0.25 µg/µL MMC for 16 h, and the cells harvested by trypsin-EDTA treatment were used for preparing the cell lysates. Protein separation was performed in a 7% tris-glycine SDS-PAGE gel and transferred on a polyvinylidene difluoride membrane. Non-ubiquitinated and ubiquitinated forms of FANCD2 were probed using an anti-FANCD2 antibody (sc-20022, Santa Cruz Biotechnology) and horseradish peroxidase-conjugated anti-mouse secondary antibody (Cell Signaling) and detection was performed using an enhanced luminol-based chemiluminescence substrate (Westar Supernova, Cyanagen).

### Next-generation sequencing

Exon capture for 35 samples was performed using SureSelect Human All Exon V5 (Agilent), 35 samples with xGen Exome Research Panel v1 (IDT), 42 samples with SureSelect Human All Exon V5+UTR (Agilent), 25 samples with SureSelect Human All Exon V6+UTR (Agilent) and 5 samples with a focused exome sequencing panel. All of these panels have 100% coverage for the coding sequence of FA genes. Sequencing was performed on an Illumina HiSeq X system to generate 2×150 bp sequence reads with 8–10 GB of data per sample.

### Bioinformatics of exome sequencing data and variant prioritisation

Fastq-mcf (ea-utils-1.1.2-806) was utilised for trimming adapter sequences from the raw reads, and Bedtools-2.17 was used for coverage metrics. A GATK Best Practices bioinformatics analysis using Sentieon (v201808.01) was used to identify germline variants in the samples. The sequences obtained were quality-checked and aligned to the human reference genome (GRCh37/hg19) using the Sentieon aligner. The alignment files were processed using Sentieon to remove duplicates, recalibrate, and realign indels. Gene annotation of the variants was performed using the Ensembl Variant Effect Predictor against the human gene model (release 91). Single-nucleotide variants (SNVs) with >3% overall population allele frequency in 1000Genome Phase 3<sup>74</sup>, gnomAD (v2.1), EVS, dbSNP (v151), as well as MedGenome's Indian population database<sup>76</sup> and deep intronic and intergenic variants were excluded for further analysis. The variants were sequentially prioritised based on their reported status in disease databases (HGMD, ClinVar) and multiple in-silico prediction tools, such as PolyPhen-2, SIFT, MutationTaster2, LRT, EVE.<sup>73</sup> Copy number variants (CNVs) were detected from targeted

sequence data using ExomeDepth (v1.1.10). This algorithm detects CNVs based on comparing the read depths of the test data with the matched aggregate reference dataset. For all the samples, copy number variants (CNVs) were evaluated for identifying deletions and duplications involving one or more exons. Bayes factors of more than 15 were retained. CNVs with low statistical confidence and possibility of being false positive due to the presence of pseudogene in the genome were filtered out. The prioritised variants were classified based on ACMG guidelines. Online tools of Varsome and EVE, a recent computational method, were used together for the classification. Additionally, VarSeq 2.2.0 (Golden Helix Inc., Bozeman, MT, United States), a clinical genomics interpretation and reporting platform, was also used to analyse SNVs and CNVs in the 6 samples in which our pipeline identified heterozygous mutations and therefore could not establish the disease-causing genotypes.

#### **Detection of deletions using multiplex ligation-dependent probe amplification (MLPA) and gene dosage analysis**

Deletions in *FANCA* were identified by MLPA using SALSA MLPA P031 and P032 Probe Mixes and SALSA MLPA EK1 reagent kit (MRC Holland) and Coffalyser software (MRC Holland) as per the manufacturer's protocol. To confirm the deletion identified by CNV analysis in the *UBE2T* gene, a gene dosage quantitative multiplex fluorescent-PCR was performed as we described previously<sup>78</sup>. Briefly, a 327 bp fragment from exon 7 of *UBE2T* was amplified along with a short fragment of the human albumin gene (Mayuranathan et al., 2012) by multiplex PCR using fluorescently labeled forward primers (**Table S7**), and the products were analysed by capillary electrophoresis. For accurate gene dosage analysis, 200ng of DNA and 20 cycles were used for the PCR with 0.4 µM labeled primers. The amplified products were separated by capillary electrophoresis in an ABI-3130 Genetic Analyser (Applied Biosystems), and the results were analysed by GeneMapper software version 4.0 (Applied Biosystems). The peak heights of the *UBE2T* amplicon were intranormalized by dividing them by the peak heights of the albumin gene. Subsequently, internormalization was performed by dividing the intranormalized peak height of *UBE2T* of the patient sample with that of the control sample.

#### **Long-amplicon next-generation sequencing**

The *FANCA* gene was amplified as 6 fragments, ranging from 7.15 to 15.25 kb, and *FANCG* as a single fragment of 6.73kb from the patients' DNA samples using GoTaq Long PCR Master Mix (Promega), according to the manufacturer's protocol. Primers were designed using Primer3 (v. 0.4.0) software (<http://bioinfo.ut.ee/primer3-0.4.0/>) to encompass all the exons and their splice sites (**Table S7**). The amplified DNA fragments (amplicons) were analysed by 1% agarose gel electrophoresis. Based on the ethidium bromide staining intensities of the PCR amplicons, equal amounts of amplicons were pooled and sheared, and the libraries were prepared using TruSeq Nano DNA Library Preparation Kit (Illumina). The resulting libraries were sequenced on an Illumina NextSeq-500 sequencer to generate 2×150 bp reads at approximately 100× sequencing depth. The generated sequence data were analysed for quality, and a minimum of 75% of the sequenced bases (Q30) were processed to generate FastQ files. The NGS data (FastQ) were analysed by a pipeline developed in Galaxy ([galaxyproject.org](http://galaxyproject.org)), as briefly outlined below. The browser extensible data (BED) file of the target region was created using BED Tools. The adapters were trimmed from the raw reads and aligned against the BED file using BWA (Galaxy version 0.7.17.1), alignment post-processing was performed by removing PCR duplicates<sup>79</sup>, variant calling was done using FreeBayes, and then the variants were normalised using VCF ALLELIC PRIMITIVES<sup>80</sup>. The VCF files were further annotated using SnpSift (ref seq-hg19). The variants were also annotated using wANNOVAR to determine the mutations' functional consequences.

#### **Plasmids**

pLX301-*FANCA*, pLX301-*FANCG* and pLX301-*FANCC* were generated by Gateway cloning using the entry vectors pENTR223.1-*FANCA* (TransOMIC Technologies), pDONR221-*FANCG* (DNASU), and pDONR221-*FANCC* (DNASU), and the destination vector pLX301 (a kind gift from David Root, Addgene ID: 25895). Gateway cloning was carried out using the LR Clonase Enzyme mix (Thermo Scientific). *FANCL* and *FANCF* cDNAs were generated from a normal individual's blood cells using PrimeScript 1st Strand cDNA Synthesis Kit (TaKaRa) and gene specific primers (**Table S7**) and amplified using PrimeSTAR GXL PCR master mix (TaKaRa) with primer sequences suitable for Gibson cloning (**Table S7**). The amplified cDNAs were cloned into pCW-Cas9 (a kind gift from Eric Lander and David Sabatini, Addgene ID: 50661) by Gibson assembly using NEBuilder HiFi DNA Assembly Master Mix (New England Biolabs) after removing the Cas9 gene with BamHI and NheI enzymes.

**Lentivirus preparation and transduction of fibroblasts**

Lentiviruses were prepared using a second-generation packaging system using the envelope plasmid pMD2.G and the packaging plasmid psPAX2 (gifts from Didier Trono, Addgene IDs: 12256 and 12260, respectively). The lentiviral expression, envelope and packaging plasmids were mixed in a 2:1:1 ratio and transfected into HEK 293T cells using the TransIT-293 transfection reagent (Mirus Bio), according to the manufacturer's protocol. The supernatants containing the lentiviral particles were collected at 48, 60, and 72 h post-transfection and were concentrated using Lenti-X Concentrator (Clontech Laboratories), according to the manufacturer's protocol. After reaching 70% confluency, fibroblasts were transduced with an appropriate volume of lentiviruses in 2 mL of medium containing 6 µg/mL polybrene (Sigma–Aldrich). The medium was changed 24 h post-transduction. After 72 h, antibiotics for selecting the transduced cells were added, and the cells were cultured in this antibiotics-containing medium until the selection was complete.

### Supplementary Figure legends

**Figure S1. Geographical distribution** of the FA patients recruited in this study.

**Figure S2. Pipeline for the bioinformatics analysis of WES reads.** \*ClinVar, OMIM, HGMD, SwissVar, 1000 Genome Phase3, gnomAD, EVS, dbSNP, 1000 Japanese Genome and internal Indian population databases were used for variant annotations. <sup>§</sup> Nonsynonymous mutations analysed by EVE algorithm.

**Figure S3. Detection of large deletions in the FA pathway genes.** (A) Representative results of two *FANCA* deletions detected by bioinformatics analysis in two different patients and confirmation of these deletions by MLPA. FA-24 is heterozygous for a deletion from exon 21 to exon 30, and FA-11 is homozygous for a deletion from exon 32 to exon 36. Probe mixes 1 and 2 cover all the exons of *FANCA*. (B) Position of the different *FANCA* deletions identified in this study (C) Detection of *FANCT(UBE2T)* deletion by bioinformatics analysis. (D-E) Genomic quantitative-PCR for gene dosage analysis to calculate the copy number of exon 7 of the *FANCT* gene. The peak heights of the amplified product of the exon 7 of the *UBE2T* gene and the control albumin gene are shown. Arrow indicates the absence of exome 7 peak in the patient. (E) Graph showing the gene dosage of *FANCT*.

**Figure S4.** MLPA analysis to detect *FANCA* gene deletions detected in 19 patients.

**Figure S5. Molecular analysis of *FANCL* (c.1092G>A;p.K364=) identified in our cohort of FA patients.** (A) Diagrammatic representation of the location of the mutation in the *FANCL* gene, exon 13 skipping in *FANCL* mRNA, the position of the primers used for amplification of the cDNA and Sanger sequencing are shown. (B) The PCR amplification of *FANCL* cDNAs from a normal control and an FA patient with the c.1092G>A;p.K364= mutation showing the difference in molecular weights of the amplified products. (C) Sanger sequencing results showing skipping of exon 13 of *FANCL* in the patient. (D) Western blot analysis showing the restoration of FANCD2 Ub after lentiviral complementation of a patient's fibroblasts with wild-type *FANCL* cDNA. The results were compared with a normal control and untransduced fibroblasts from a patient with *FANCL* (c.1092G>A;p.K364=) mutation. The vector used for complementation analysis was pCW-*FANCL*, which has doxycycline-inducible *FANCL* expression.

**Figure S6. Long amplicon next-generation sequencing to identify mutations in *FANCA* and *FANCG* gene** (A) Diagrammatic representation of the regions of *FANCA* and *FANCG* amplified for LA-PCR-NGS. (B) Agarose gel images showing the amplified *FANCA* and *FANCG* gene fragments. *FANCA*: fragment 1- 7126 bp; fragment 2- 8595 bp; fragment 3- 9726 bp; fragment 4- 13739 bp; fragment 5- 13483 bp; fragment 6- 15253 bp; and *FANCG*: fragment 7- 6760 bp.

**Figure S7. Overall schematic representation of our study.** Comparison of CBA scores and FANCD2-Ub results in the 142 FA patients recruited in this study. The interpretation and primary diagnosis based on the results of CBAs and FANCD2-Ub analysis before performing exome sequencing are shown on the right-hand side. \*mosaic patients; # only heterozygous variants identified by NGS; NA: not analysed.

Figure S1

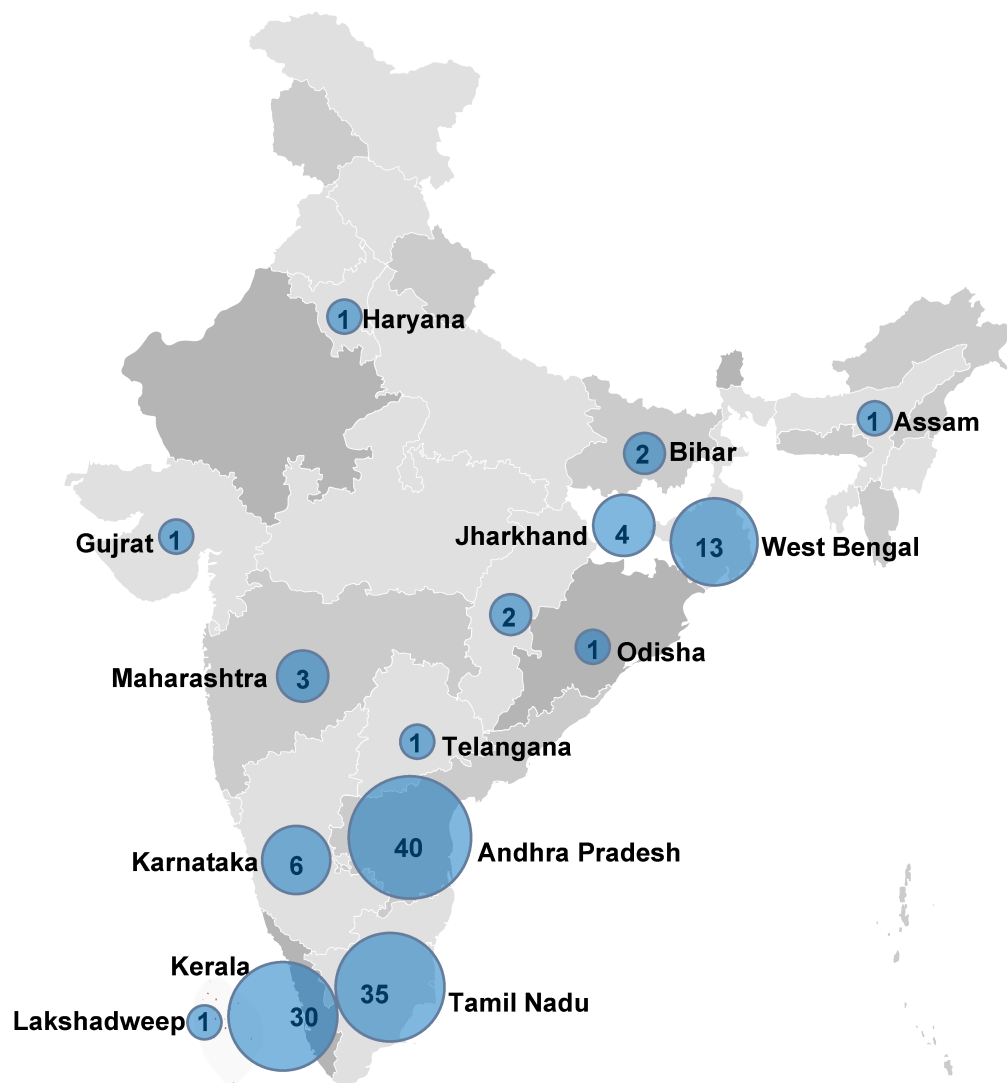

Figure S2

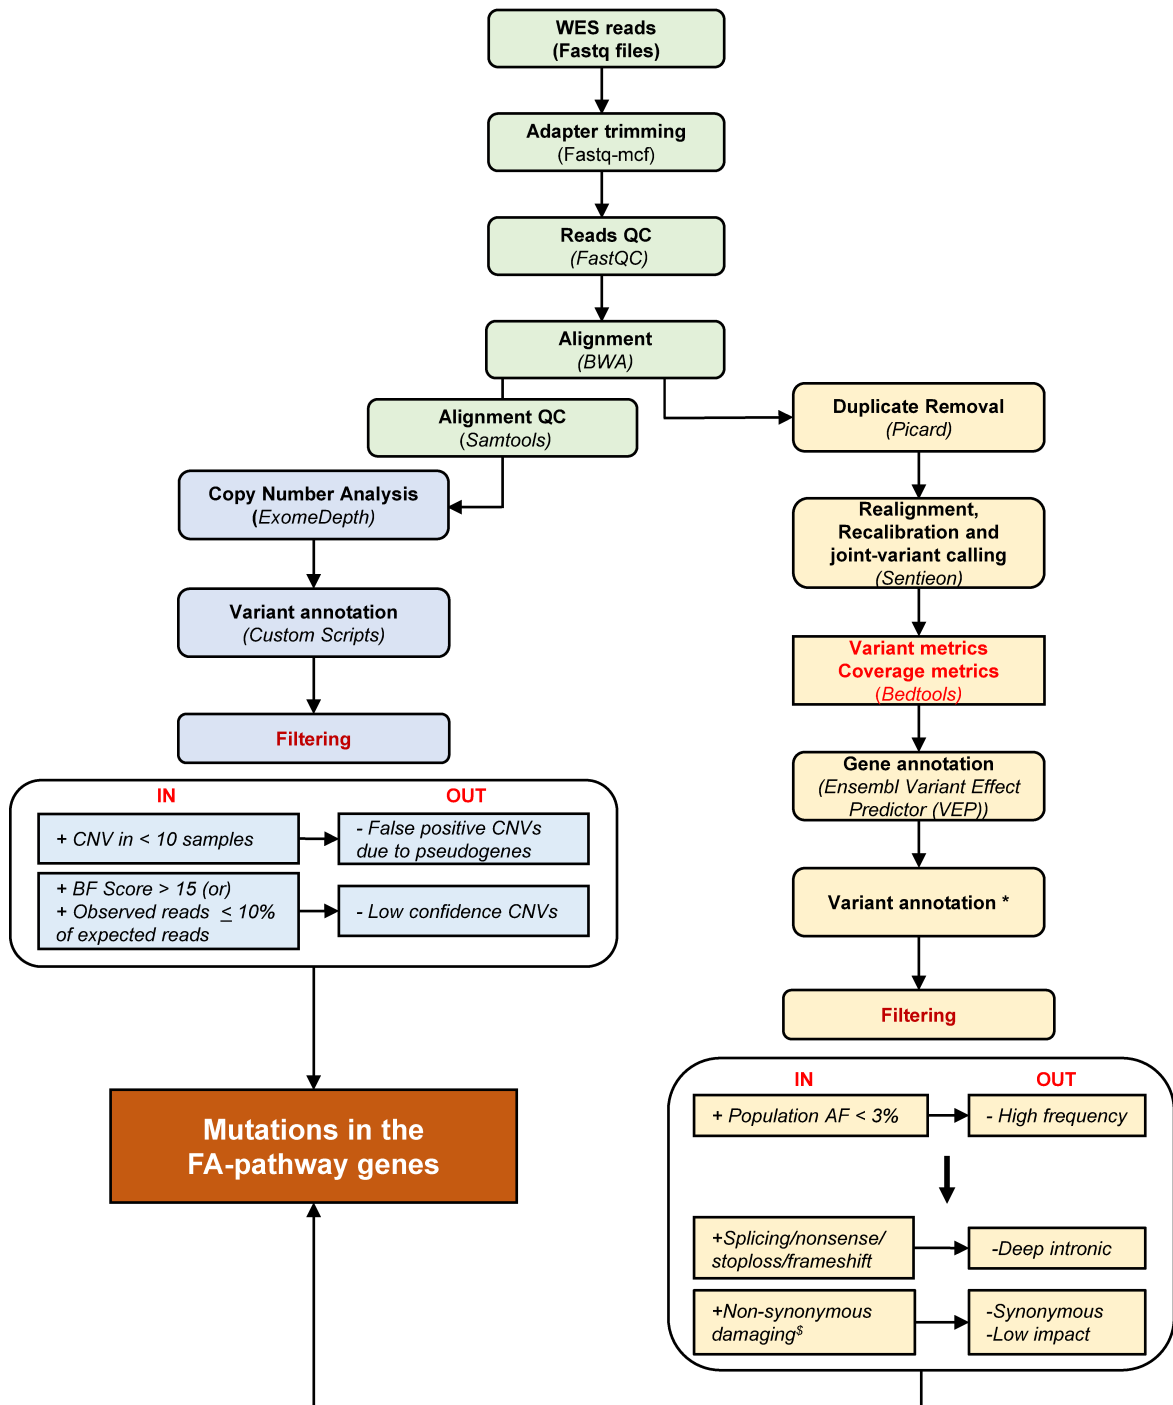



## Figure S3

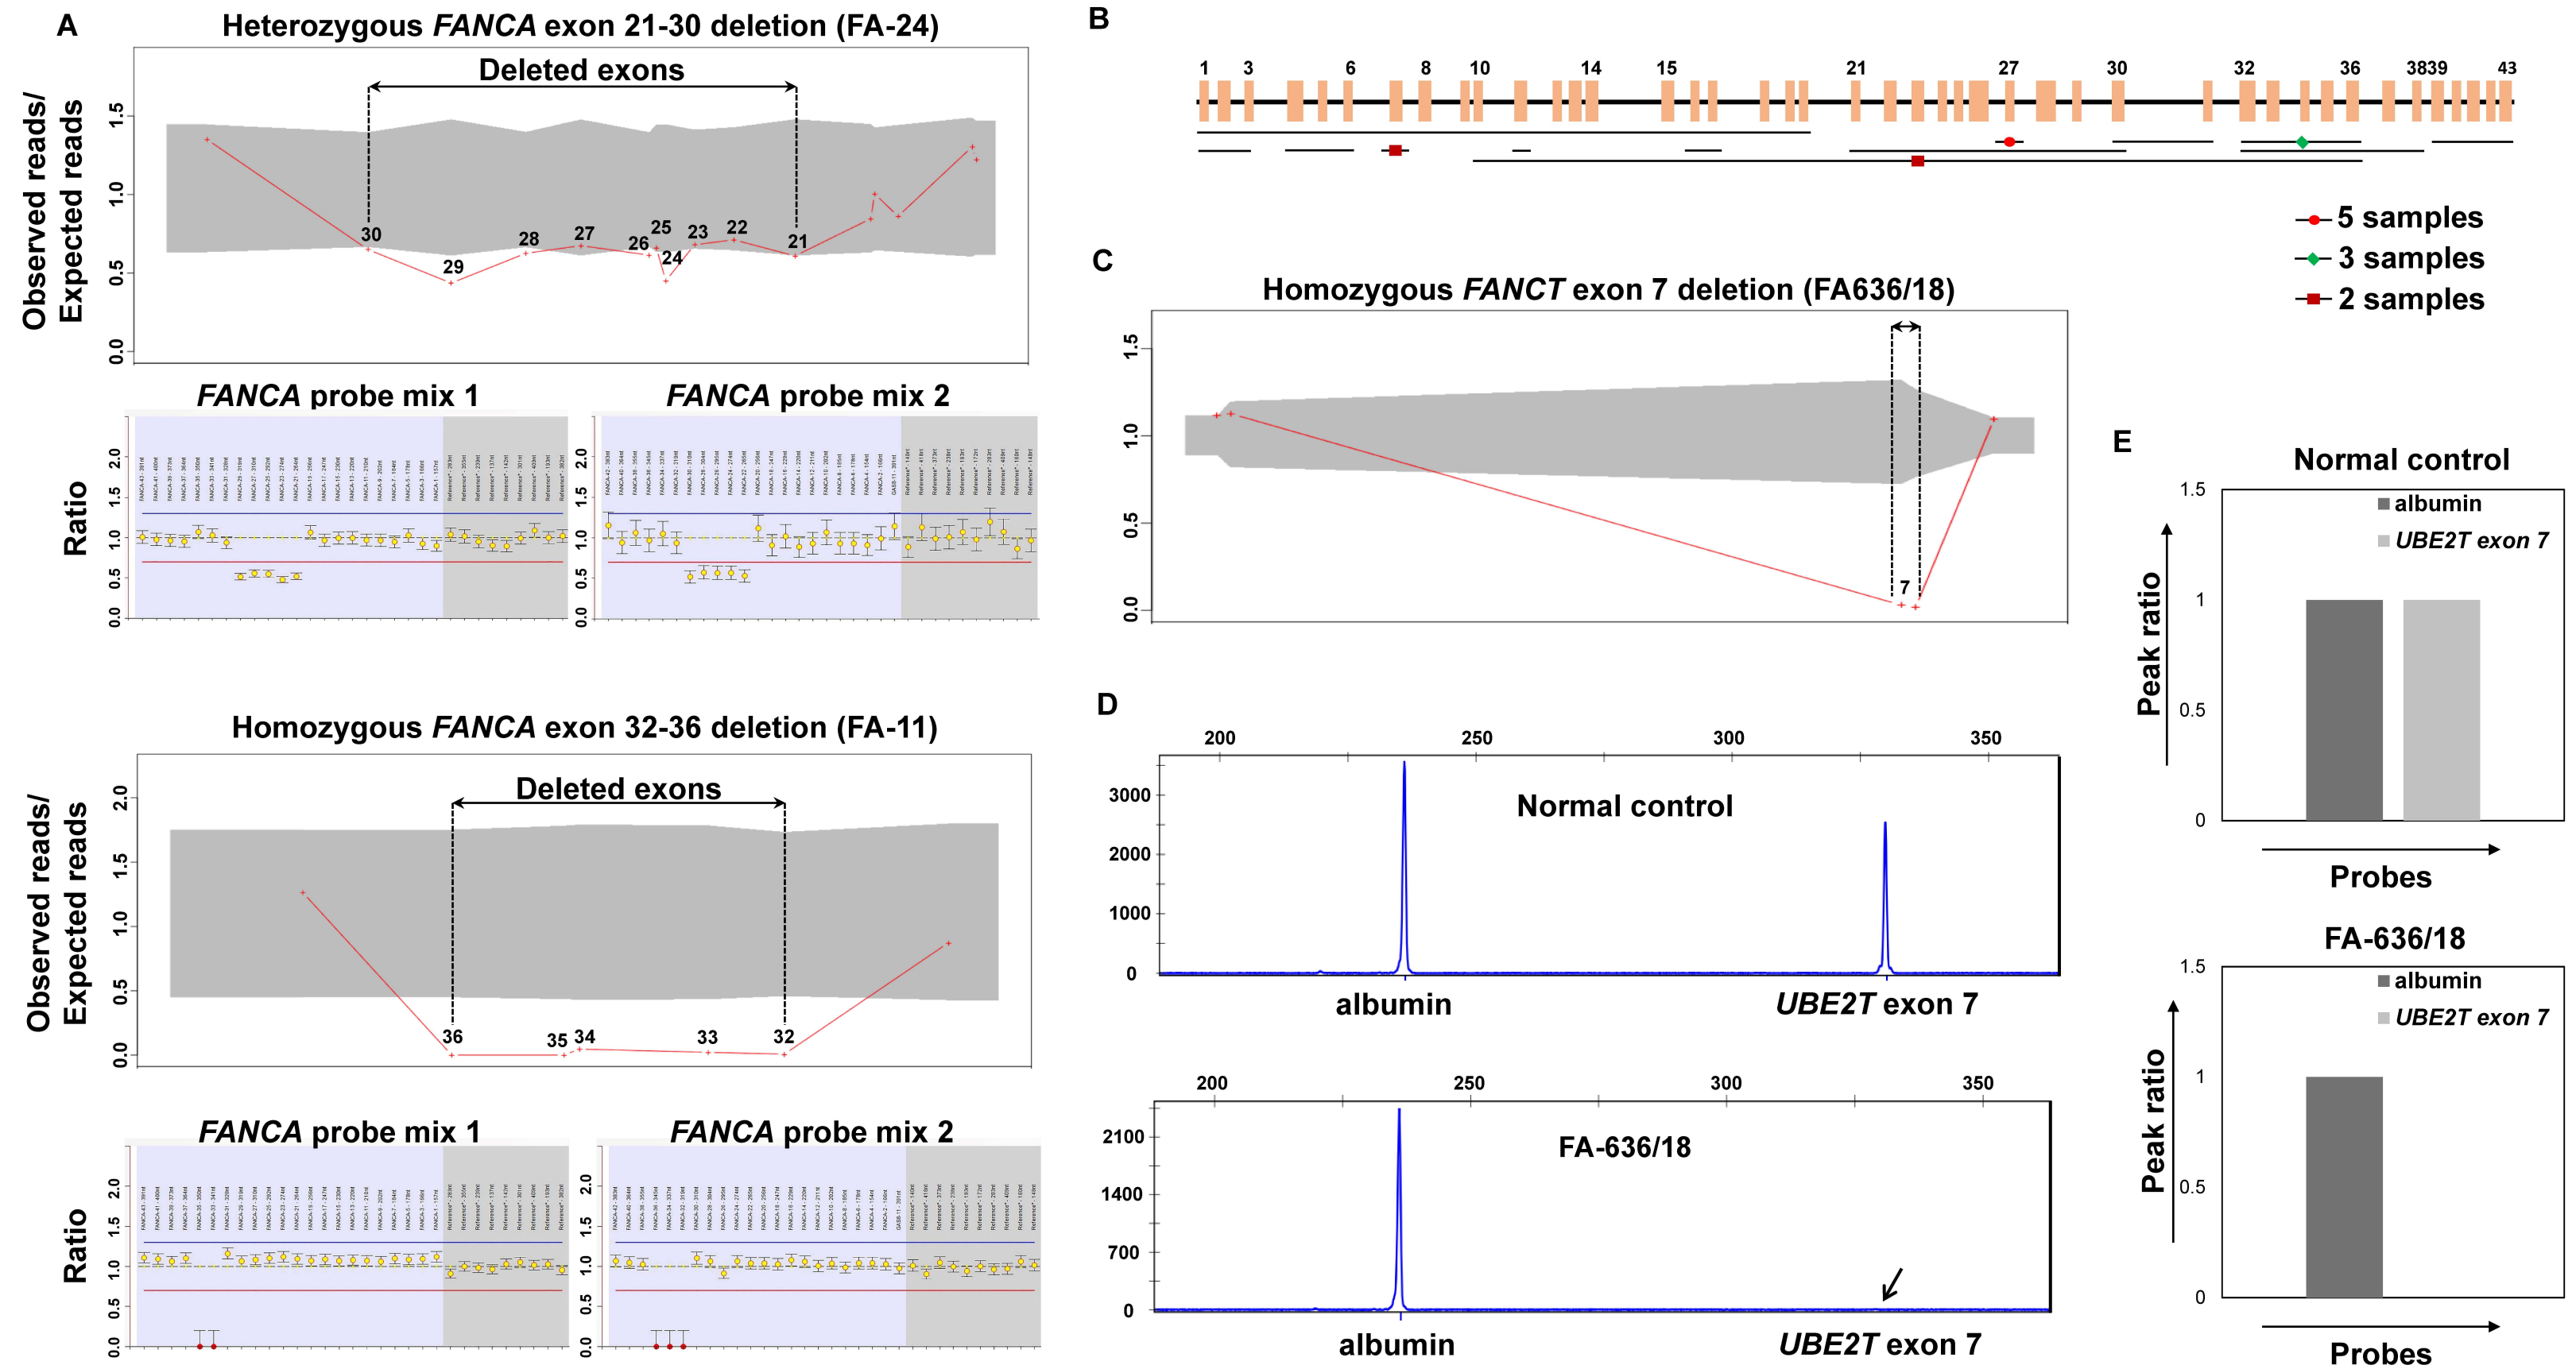

# Figure S4

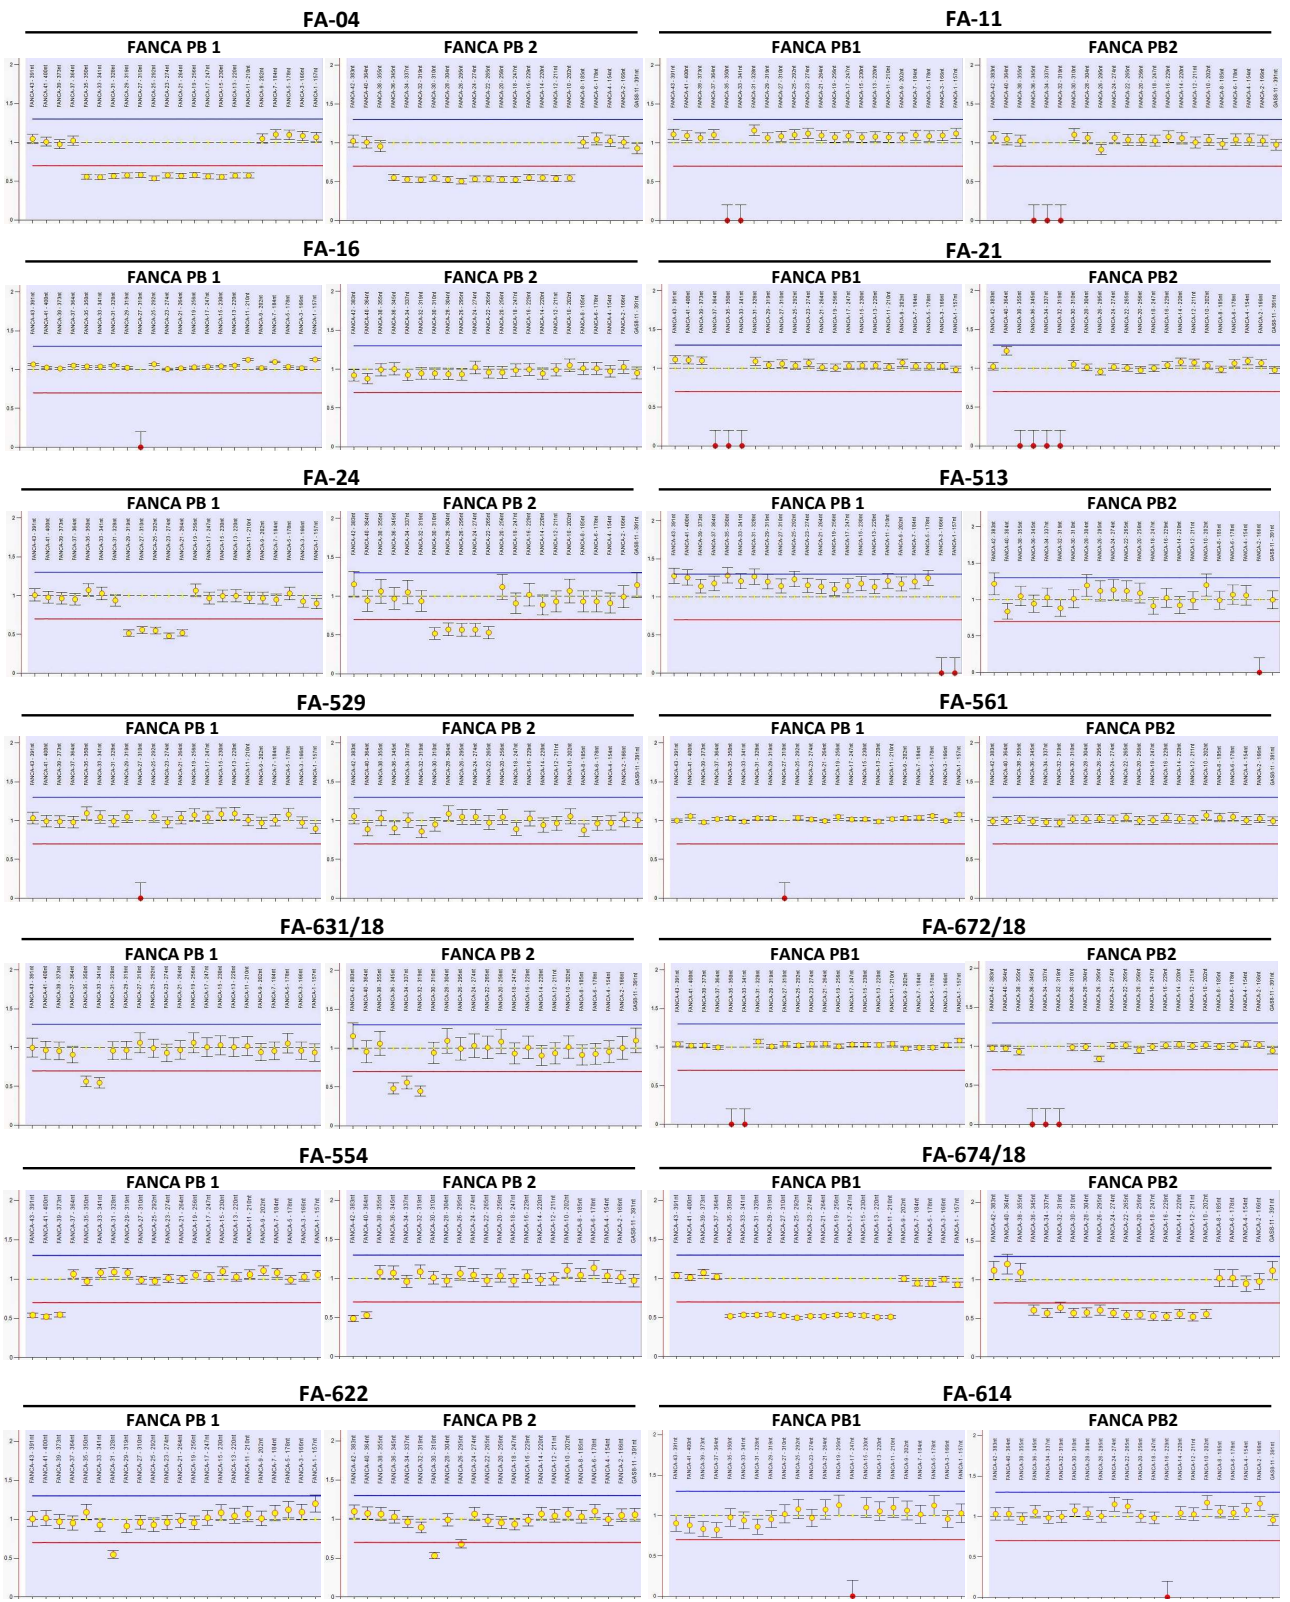





## Figure S5

A

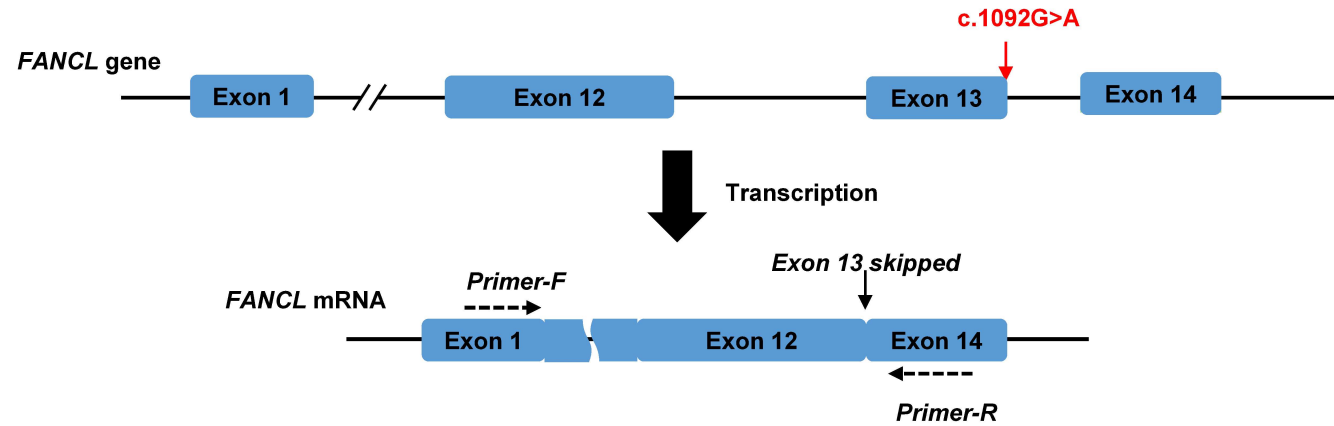

B

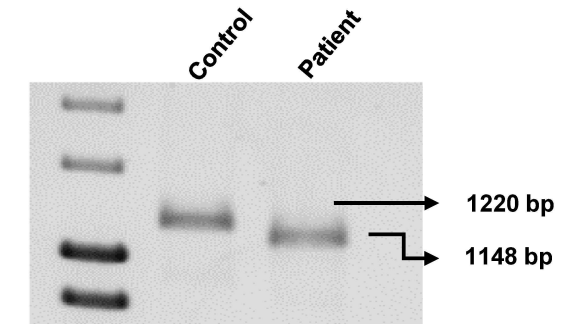

C

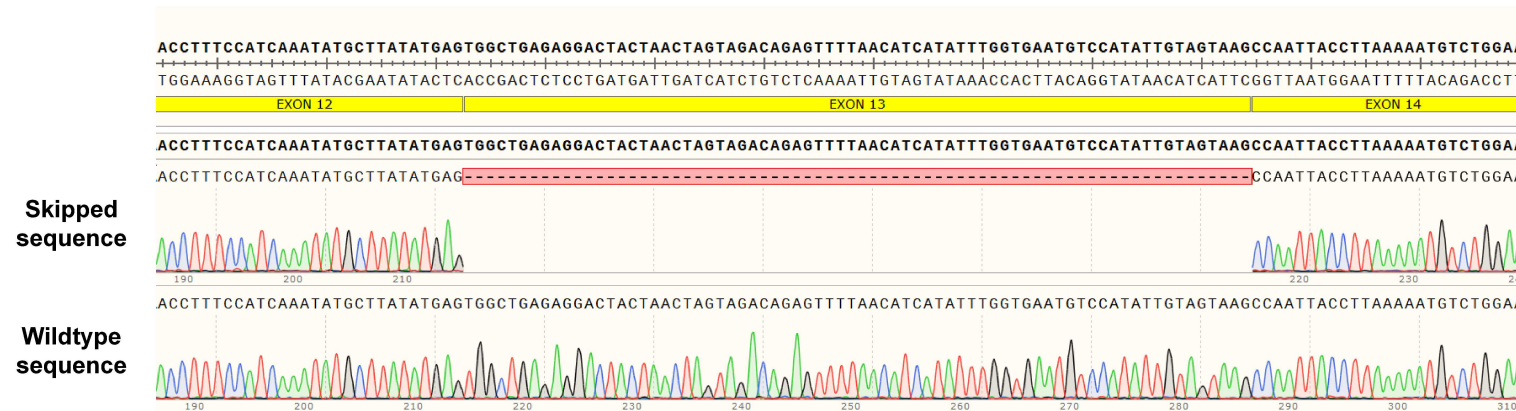

D

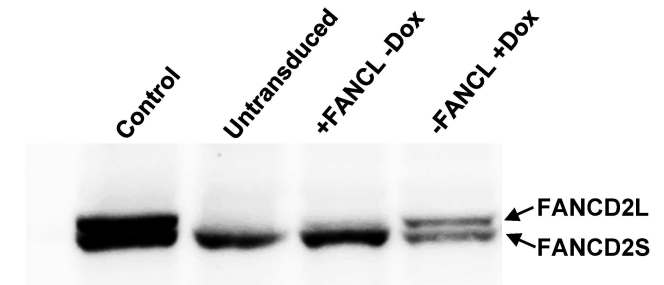



Figure S7

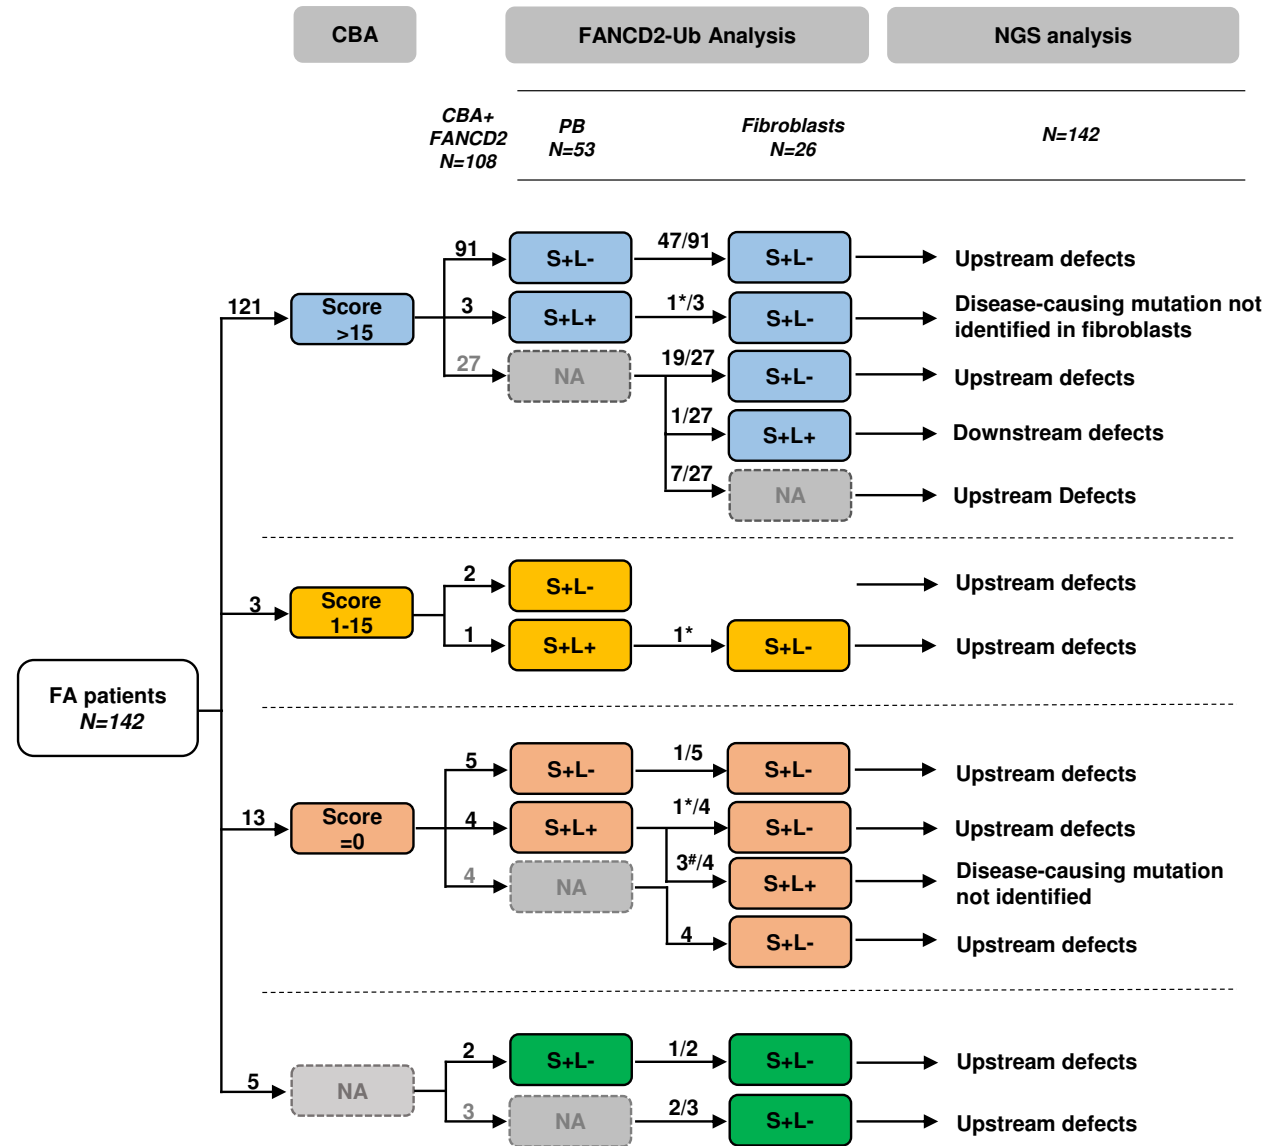

**Table S2: FANCD2-Ub status, genotypes and clinical characteristics of the patients with very low CBA scores (0-10)**

| ID        | CBA Score <sup>#</sup> | FANCD2 Ub  |            | DNA change                                                      | Gene            | Zygosity              | Skeletal abnormalities            | Facial dysmorphism    | Skin changes    | Other abnormalities |
|-----------|------------------------|------------|------------|-----------------------------------------------------------------|-----------------|-----------------------|-----------------------------------|-----------------------|-----------------|---------------------|
|           |                        | PB         | Fib        |                                                                 |                 |                       |                                   |                       |                 |                     |
| FA-07     | 0                      | FANCD2-Ub- | NA         | NC_000002.11:g.58387243C>T                                      | <i>FANCL</i>    | Homozygous            | NA                                | MCH, frontal blossing | HP, HPOP        | NA                  |
| FA-29     | 0                      | FANCD2-Ub+ | FANCD2-Ub+ | NC_000003.11:g.10076177A>C                                      | <i>FANCD2</i>   | Heterozygous          | NA                                | NA                    | NA              | HSK, kidney defects |
| FA-39     | 0                      | FANCD2-Ub+ | FANCD2-Ub+ | NC_000009.11:g.97873815G>A                                      | <i>FANCC</i>    | Heterozygous          | Thenar hypoplasia                 | NA                    | HP              | NA                  |
| FA-523*   | 0                      | FANCD2-Ub+ | FANCD2-Ub- | NC_000002.11:g.58387243C>T                                      | <i>FANCL</i>    | Homozygous            | NA                                | MCH                   | CAL, HP         | NA                  |
| FA-525    | 0                      | NA         | FANCD2-Ub- | NC_000002.11:g.58387243C>T                                      | <i>FANCL</i>    | Homozygous            | Syndactyly, Thumb placed distally | NA                    | HP, HPOP        | NA                  |
| FA-528    | 0                      | FANCD2-Ub+ | FANCD2-Ub+ | NC_000017.10:g.79516335G>T                                      | <i>C17orf70</i> | Heterozygous          | SS                                | MCH                   | NA              | NA                  |
| FA-532    | 0                      | NA         | FANCD2-Ub- | NC_000002.11:g.58387243C>T                                      | <i>FANCL</i>    | Homozygous            | NA                                | DF                    | HP, HPOP        | NA                  |
| FA-535    | 0                      | FANCD2-Ub- | NA         | NC_000002.11:g.58387243C>T                                      | <i>FANCL</i>    | Homozygous            | SS                                | MGH                   | HP              | NA                  |
| FA-538    | 0                      | FANCD2-Ub- | NA         | NC_000002.11:g.58387243C>T                                      | <i>FANCL</i>    | Homozygous            | NA                                | MCH                   | CAL             | NA                  |
| FA-541    | 0                      | NA         | FANCD2-Ub- | NC_000006.11:g.35423588G>A                                      | <i>FANCE</i>    | Heterozygous          | NA                                | NA                    | NA              | NA                  |
| FA-561    | 0                      | FANCD2-Ub- | NA         | NC_000016.9:g.89833551_89833647del                              | <i>FANCA</i>    | Homozygous            | NA                                | Hypertelorism         | HP              | NA                  |
| FA-554    | 4.1                    | FANCD2-Ub- | NA         | NC_000016.9:g.89857810C>G<br>NC_000016.9:g.89803957_89806507del | <i>FANCA</i>    | Compound heterozygous | Bilateral clinodactyly            | NA                    | CAL, HP, Pallor | NA                  |
| FA-650/18 | 4.1                    | FANCD2-Ub- | NA         | NC_000009.11:g.35079204dup                                      | <i>FANCG</i>    | Homozygous            | SS                                | NA                    | HP              | NA                  |
| FA01/19*  | 8.2                    | FANCD2-Ub+ | FANCD2-Ub- | NC_000002.11:g.58387243C>T                                      | <i>FANCL</i>    | Homozygous            | NA                                | NA                    | CAL, HP         | NA                  |

SS: short stature; DF: dysmorphic face; HP: hyperpigmentation; MCH: microcephaly; HPOP: hypopigmentation; MGH: micrognathia; CAL: café au lait; HSK: horse shoe kidney.

\* mosaicism detected by comparing the FANCD2-Ub analysis in the PB cells and fibroblasts.

<sup>#</sup> CBA score: chromosome breakage analysis score



**Table S4: Heterozygous mutations in 6 FA patients**

| FA ID    | Gene            | Mutation                   | VarSome results | EVE results           | Type of mutations | CBA score | FANCD2 ubiquitination |             | Physical anomalies                                          |
|----------|-----------------|----------------------------|-----------------|-----------------------|-------------------|-----------|-----------------------|-------------|-------------------------------------------------------------|
|          |                 |                            |                 |                       |                   |           | T-cells               | Fibroblasts |                                                             |
| FA-29    | <i>FANCD2</i>   | NC_000003.11:g.10076177A>C | Likely benign   | Pathogenic            | Missense          | 0         | FANCD2-Ub+            | FANCD2-Ub+  | HSK, kidney defects                                         |
| FA-518   | <i>FANCC</i>    | NC_000009.11:g.97873815G>A | Likely benign   | Benign                | Missense          | 0         | FANCD2-Ub+            | FANCD2-Ub+  | Thenar hypoplasia, HP                                       |
| FA-519   | <i>FANCD2</i>   | NC_000003.11:g.10083368C>T | Pathogenic      | NA (nonsense variant) | Nonsense          | 62.7      | FANCD2-Ub-            | FANCD2-Ub-  | SS, Absent simian crease, TH, TF, HP                        |
| FA-528   | <i>C17orf70</i> | NC_000017.10:g.79516335G>T | Likely benign   | NA                    | Missense          | 0         | FANCD2-Ub+            | FANCD2-Ub+  | SS, MCH                                                     |
| FA-541   | <i>FANCE</i>    | NC_000006.11:g.35423588G>A | Likely benign   | VUS                   | Missense          | 0         | NA                    | FANCD2-Ub-  | NA                                                          |
| FA-32/19 | <i>FANCA</i>    | NC_000016.9:g.89869731A>T  | VUS             | Pathogenic            | Missense          | 22.1      | FANCD2-Ub-            | NA          | Musculoskeletal abnormalities, Hypertelorism, MCH, HAP, CAL |

HSK: horse shoe kidney; AE: abnormal eyes; MCH: microcephaly; HP: hyperpigmentation; SS: short stature; TH: thumb hypoplasia ;TF: triangular facies

**Table S5: Mutations identified in *FANCA* and *FANCG* genes by LA-NGS**

| FA ID          | Gene         | Mutation                                      | Type of mutations                | Site of mutation |
|----------------|--------------|-----------------------------------------------|----------------------------------|------------------|
| FA-31          | <i>FANCA</i> | NC_000016.9:g.89882944C>G                     | Splice site                      | Intron 1         |
| FA-521         | <i>FANCA</i> | NC_000016.9:g.89877481T>G                     | Splice site                      | Intron 3         |
| FA-500/ FA-05  | <i>FANCA</i> | NC_000016.9:g.89857866C>T                     | Missense                         | Exon 14          |
| FA-503/ FA-15  | <i>FANCA</i> | NC_000016.9:g.89851261C>T                     | Splice site                      | Intron 15        |
| FA-505/ FA-09  | <i>FANCA</i> | NC_000016.9:g.89877340_89877341del            | Splice site                      | Intron 4         |
|                |              | NC_000016.9:g.89877448del                     | Frameshift deletion              | Exon 4           |
| FA-515/ FA-03  | <i>FANCA</i> | NC_000016.9:g.89813237A>C                     | Splice site                      | Intron 34        |
|                |              | NC_000016.9:g.89828423T>G                     | Missense                         | Exon 29          |
|                |              | NC_000016.9:g.89882965;C>T                    | Missense                         | Exon 1           |
| FA-551/ FA-18  | <i>FANCA</i> | NC_000016.9:g.89828357C>G                     | Missense                         | Exon 29          |
| FA-555/ FA-516 | <i>FANCA</i> | NC_000016.9:g.89825022del                     | Frameshift insertion             | Exon 30          |
| FA-568         | <i>FANCA</i> | NC_000016.9:g.89828423T>G                     | Missense                         | Exon 29          |
| FA-574/ FA-511 | <i>FANCA</i> | NC_000016.9:g.89831327G>A                     | Nonsense                         | Exon 28          |
| FA-20/19       | <i>FANCA</i> | NC_000016.9:g.89877481T>G                     | Splice site                      | Intron 3         |
| FA-27/19       | <i>FANCA</i> | NC_000016.9:g.89866011A>G                     | Splice site                      | Intron 9         |
| FA-36/19       | <i>FANCG</i> | NC_000009.11:g.35074215T>G                    | Splice site                      | Intron 13        |
| FA-37/19       | <i>FANCG</i> | NC_000009.11:g.35074215T>G                    | Splice site                      | Intron 13        |
|                |              | NC_000016.9:g.89877448del                     | Frameshift Deletion              | Exon 4           |
| FA-573         | <i>FANCA</i> | NC_000016.9:g.89883022A>T                     | Missense                         | Exon 1           |
|                |              | NC_000009.11:g.35078222_35078223delinsAGCAGTT | Frameshift insertion<br>deletion | Exon 4           |
| FA-580         | <i>FANCG</i> | NC_000009.11:g.35078222_35078223delinsAGCAGTT | Frameshift insertion<br>deletion | Exon 4           |
| FA-581         | <i>FANCA</i> | NC_000016.9:g.89809216_89809219del            | Frameshift Deletion              | Exon 37          |
| FA-584         | <i>FANCA</i> | NC_000016.9:g.89877327_89877344del            | Frameshift Deletion              | Exon 4, Intron 4 |
| FA-588         | <i>FANCG</i> | NC_000009.11:g.35074215T>G                    | Splice site                      | Intron 13        |
| FA-591         | <i>FANCA</i> | NC_000016.9:g.89866011A>G                     | Splice site                      | Intron 9         |
| FA-593         | <i>FANCA</i> | NC_000016.9:g.89828358G>A                     | Missense                         | Exon 29          |
| FA-598         | <i>FANCG</i> | NC_000009.11:g.35075059G>A                    | Nonsense                         | Exon 12          |
| FA-599         | <i>FANCA</i> | NC_000016.9:g.89877327_89877344del            | Frameshift Deletion              | Exon 4, Intron 4 |
| FA-622         | <i>FANCA</i> | NC_000016.9:g.89816231_89816232del            | Frameshift deletion              | Exon 32          |

**Table S6: List of primers used in this study**

| Purpose                                                              | Target Gene  | Forward Primer (5'-3')                | Reverse primer (5'-3')                           |
|----------------------------------------------------------------------|--------------|---------------------------------------|--------------------------------------------------|
| Long amplicons for NGS                                               | <i>FANCA</i> | TGGTCTCTTCAGGACCAACC                  | TGCGATAAGCCAAGATAGCA                             |
|                                                                      |              | GATCTGGATGGAGGCAACAGAGT               | CCCAACAAGAGATGACCGGATAC                          |
|                                                                      |              | GGGCTTTGTTTGAGGAAGTCTGTT              | CGAGAAGGTGAGCTTTCTGTACCA                         |
|                                                                      |              | TACCCCTAAGGATCCCAAAAGGAT              | AGAAGGCTCCATGCGTCTAA                             |
|                                                                      |              | GCCTCGACTGGTCTAGAAGTCC                | TGCCCAGGATCTACTAGGCCATTT                         |
|                                                                      |              | AGGGCAGGGTAAACAATGTGAGT               | CCCTCAAGTACCACATGACCAAAC                         |
|                                                                      | <i>FANCG</i> | GCTCGACAGTGAGCAGAGAAAGGAT             | CTTTCACCTGTACCCACACAGACA                         |
| Gene dosage PCR                                                      | <i>UBE2T</i> | TTGATAATCTACCAGAGGCT                  | GGCCAGTTTACTCCCAGACA                             |
| Primer for cDNA synthesis of <i>FANCL</i> gene                       |              | -                                     | TTAAGTTTCCAGCTCTTCAC                             |
| Primer for detection of mutation (c.1092G>A;p.K364=) in <i>FANCL</i> | <i>FANCL</i> | CATCCCTTACTCTTGCAAAACA                | TCACCTAGGAAATCTAGAAAAGGA                         |
| Amplification of <i>FANCL</i> cDNA                                   |              | GTCTAGAGCTTTTCTGTGTT                  | TTAAGTTTCCAGCTCTTCAC                             |
| Primer for cDNA synthesis of <i>FANCF</i> gene                       | <i>FANCF</i> | -                                     | ATACTTTGGACACACGAAGG                             |
| Gibson cloning of <i>FANCF</i> gene into pCW vector                  | <i>FANCF</i> | tggttagcGTAGGGCCTTCGCGCAC             | ccggatccCATATATTTGGTGAGAACATTGTAATTTTCATTTTGTAAC |
| Gibson cloning <i>FANCL</i> gene into pCW vector                     | <i>FANCL</i> | cagatcgcctggagaattggGTTTCTCCGACTTCGAG | aaggcgcaacccaaccccgCGAAATGTTGTATTCTTATTTTCAGTG   |

**Table S7: The genotypes of the FA patients selected for complementation analysis**

| ID        | Gene  | Zygoty                | DNA change                          | Type of mutation                 | Varsome           | EVE        |
|-----------|-------|-----------------------|-------------------------------------|----------------------------------|-------------------|------------|
| FA-01     | FANCG | Homozygous            | NC_000009.11:g.35074215T>G          | Splice site                      | Pathogenic        | NA         |
| FA-03     | FANCA | Compound heterozygous | NC_000016.9:g.89813237A>C           | Splice site                      | Pathogenic        | NA         |
|           |       |                       | NC_000016.9:g.89828423T>G           | Missense                         | VUS               | Pathogenic |
| FA-03/19  | FANCI | Compound heterozygous | NC_000015.9:g.89804822del           | Frameshift deletion              | Pathogenic        | NA         |
|           |       |                       | NC_000015.9:g.89848828_89848832del  | Intronic splice acceptor variant | VUS               | NA         |
| FA-04     | FANCA | Compound heterozygous | NC_000016.9:g.89882396T>C           | Splice site                      | Pathogenic        | NA         |
|           |       |                       | NC_000016.9:g.89811367_89865640del  | Deletion                         | Pathogenic        | NA         |
| FA-06     | FANCA | Homozygous            | NC_000016.9:g.89828423T>G           | Missense                         | Likely pathogenic | Pathogenic |
| FA-12     | FANCA | Compound heterozygous | NC_000016.9:g.89809286_89809290dup  | Frameshift insertion             | Likely pathogenic | NA         |
|           |       |                       | NC_000016.9:g.89857867G>A           | Missense                         | Likely pathogenic | Pathogenic |
| FA-18     | FANCA | Homozygous            | NC_000016.9:g.89828357C>G           | Missense                         | Likely pathogenic | Pathogenic |
| FA-24     | FANCA | Compound heterozygous | NC_000016.9:g.89809302C>T           | Nonsense                         | Pathogenic        | NA         |
|           |       |                       | NC_000016.9:g.89828358_89842224del  | Deletion                         | Pathogenic        | NA         |
| FA-26     | FANCG | Homozygous            | NC_000009.11:g.35076427_35076431del | Splice site                      | VUS               | NA         |
| FA-30     | FANCF | Homozygous            | NC_000011.9:g.22646233T>C           | Stop loss                        | VUS               | NA         |
| FA-31     | FANCA | Homozygous            | NC_000016.9:g.89882944C>G           | Splice site                      | Pathogenic        | NA         |
| FA-36     | FANCG | Homozygous            | NC_000009.11:g.35075650_35075651del | Frameshift deletion              | Pathogenic        | NA         |
| FA-38     | FANCG | Compound heterozygous | NC_000009.11:g.35078223A>G          | Missense                         | VUS               | Pathogenic |
|           |       |                       | NC_000009.11:g.35076856_35076857del | Frameshift deletion              | VUS               | NA         |
| FA-40     | FANCA | Homozygous            | NC_000016.9:g.89877448del           | Frameshift deletion              | Pathogenic        | NA         |
| FA-517    | FANCC | Homozygous            | NC_000009.11:g.97873912C>A          | Nonsense                         | Pathogenic        | NA         |
| FA-527    | FANCC | Homozygous            | NC_000009.11:g.97864081T>G          | Missense                         | VUS               | Pathogenic |
| FA-531    | FANCG | Homozygous            | NC_000009.11:g.35076026C>G          | Splice site                      | Pathogenic        | NA         |
| FA-533    | FANCA | Compound heterozygous | NC_000016.9:g.89858399_89858400del  | Frameshift deletion              | VUS               | NA         |
|           |       |                       | NC_000016.9:g.89806402C>T           | Missense                         | VUS               | Pathogenic |
| FA-543    | FANCL | Homozygous            | NC_000002.11:g.58387243C>T          | Exonic splice donor variant      | Pathogenic        | NA         |
| FA-641/18 | FANCF | Homozygous            | NC_000011.9:g.22647316A>C           | Missense                         | VUS               | VUS        |

NA- not applicable

VUS- Variants of uncertain significance

**Table S8: Calculation of sensitivity of CBA and FANCD2 Ub analysis with NGS as gold standard**

|                    |                | <b>CBA</b> |                |          |
|--------------------|----------------|------------|----------------|----------|
|                    |                | Disease    |                |          |
| <b>Test</b>        | <b>Present</b> | <b>n</b>   | <b>Absent</b>  | <b>n</b> |
| Positive           | True Positive  | 119        | False positive | 2        |
| Negative           | False Negative | 13         | True Negative  | 3        |
| <b>Sensitivity</b> |                | 91.50%     |                |          |
| <b>Specificity</b> |                | 60%        |                |          |

  

|                    |                | <b>FANCD2 Ub analysis</b> |                |          |
|--------------------|----------------|---------------------------|----------------|----------|
|                    |                | Disease                   |                |          |
| <b>Test</b>        | <b>Present</b> | <b>n</b>                  | <b>Absent</b>  | <b>n</b> |
| Positive           | True Positive  | 130                       | False positive | 2        |
| Negative           | False Negative | 2                         | True Negative  | 3        |
| <b>Sensitivity</b> |                | 97.00%                    |                |          |
| <b>Specificity</b> |                | 60%                       |                |          |

CBA and FANCD2 Ub analysis is compared to NGS
