# Supplementary material
Source: HighWire-hosted journal article supplement (https://jmg.bmj.com/content/60/8/801)
Supplement: inline-supplementary-material-2 [file inline-supplementary-material-2.pdf]

Table S1: Spectrum of congenital abnormalities in 142 patients

| ID            | Region         | Gene     | Gender | Diagnosis | Treatment       | Consanguinity | Skeletal abnormalities                       | Facial dysmorphism             | Skin changes              | Other abnormalities | Relatives with FA            |
|---------------|----------------|----------|--------|-----------|-----------------|---------------|----------------------------------------------|--------------------------------|---------------------------|---------------------|------------------------------|
| FA-01/ FA-536 | Tamil Nadu     | FANCG    | M      | NA        | Danazol         | Yes           | NA                                           | NA                             | HPOP,Leukoplakia          | NA                  | NA                           |
| FA01/19       | Kerala         | FANCL    | M      | MDS       | BMT             | NA            | NA                                           | NA                             | CAL, HP                   | NA                  | NA                           |
| FA-02         | Tamil Nadu     | FANCL    | M      | MDS       | Danazol         | No            | NA                                           | MCH                            | CAL                       | NA                  | NA                           |
| FA-03/ FA-515 | Assam          | FANCA    | F      | NA        | Danazol         | NA            | TH, TA                                       | DF                             | HP                        | NA                  | NA                           |
| FA-03/19      | West Bengal    | FANCI    | M      | NA        | Stanozolol      | No            | SS                                           | LSE, MOA, MCH, TF              | HP, CAL                   | NA                  | Sister                       |
| FA-04/ FA-509 | Kerala         | FANCA    | M      | NA        | Stanozolol      | No            | BT, Absent thumb                             | LSE                            | HP, HPOP, CAL             | NA                  | NA                           |
| FA-05/ FA-500 | Tamil Nadu     | FANCA    | M      | NA        | Stanozolol      | Yes           | NA                                           | NA                             | HP                        | NA                  | NA                           |
| FA-06         | West Bengal    | FANCA    | M      | MDS       | BMT             | NA            | SS, TH, Thenar hypoplasia                    | TF                             | HPOP, HP                  | NA                  | NA                           |
| FA-07         | Andhra Pradesh | FANCL    | M      | NA        | Stanozolol/BMT  | NA            | NA                                           | MCH, frontal blossing          | HP, HPOP                  | NA                  | NA                           |
| FA-08/ FA-552 | Andhra Pradesh | FANCA    | M      | DKC       | Stanozolol/BMT  | Yes           | NA                                           | NA                             | HP, leukoplakia           | NA                  | NA                           |
| FA-09/ FA-505 | Kerala         | FANCA    | F      | NA        | Danazol/BMT     | No            | NA                                           | NA                             | HPOP                      | NA                  | NA                           |
| FA-10         | Tamil Nadu     | FANCA    | F      | NA        | Danazol         | Yes           | Clinodactyly                                 | MCH, MGH, HAP                  | HP, POH                   | NA                  | NA                           |
| FA-11/ FA-524 | Kerala         | FANCA    | M      | NA        | Stanozolol      | No            | SS, Arachinodactyly                          | DF                             | HP                        | NA                  | NA                           |
| FA-12         | West Bengal    | FANCA    | F      | NA        | Danazol         | No            | NA                                           | NA                             | HP, POH                   | NA                  | NA                           |
| FA-12/19      | Kerala         | FANCA    | M      | NA        | Stanozolol      | No            | Hypothenar, clinodactyly, partial syndactyly | HAP                            | CAL                       | HSK                 | NA                           |
| FA-13         | Kerala         | FANCG    | M      | NA        | Stanozolol      | NA            | NA                                           | MCH,TF                         | HPOP, HP                  | HSK                 | NA                           |
| FA-14/ FA-534 | Andhra Pradesh | FANCL    | M      | NA        | Stanozolol      | No            | NA                                           | NA                             | HP                        | NA                  | NA                           |
| FA-15 FA-503  | Andhra Pradesh | FANCA    | F      | NA        | Danazol/BMT     | NA            | SS                                           | MCH                            | HP                        | ARP                 | Sister                       |
| FA-16         | Andhra Pradesh | FANCA    | F      | NA        | Danazol         | Yes           | SS                                           | MGH                            | HP                        | NA                  | NA                           |
| FA-17/19      | Tamil Nadu     | FANCA    | M      | NA        | Stanozolol      | No            | NA                                           | MCH                            | CAL                       | NA                  | Brother                      |
| FA-18/ FA-551 | Andhra Pradesh | FANCA    | M      | AML       | Stanozolol      | No            | SS                                           | LSE                            | HP                        | NA                  | Sister had AA                |
| FA-18/19      | Tamil Nadu     | FANCA    | M      | NA        | Stanozolol      | No            | BT, polydactyly                              | DF, EF, HAP                    | HP                        | NA                  | Brother                      |
| FA18/20       | Kerala         | FANCL    | F      | NA        | Danazol/BMT     | No            | Nail dystrophy, Scoliosis                    | NA                             | HP, oral leukoplakia, CAL | NA                  | NA                           |
| FA-19         | Karnataka      | FANCL    | M      | NA        | Stanozolol      | NA            | BT, SS                                       | MOA, MCH                       | HP                        | NA                  | NA                           |
| FA-20         | Tamil Nadu     | FANCG    | M      | NA        | Stanozolol      | Yes           | BT, Polydactyly                              | AE, MGH                        | HP                        | NA                  | NA                           |
| FA-20/19      | Andhra Pradesh | FANCA    | M      | NA        | Stanozolol      | Yes           | NA                                           | DF                             | HP                        | Ectopic kidney      | NA                           |
| FA-21/ FA-510 | Jharkhand      | FANCA    | M      | NA        | Stanozolol      | Yes           | BT                                           | AE                             | HP                        | NA                  | NA                           |
| FA-22         | Kerala         | FANCA    | M      | NA        | Stanozolol/ BMT | Yes           | Polydactyly                                  | DF                             | Petechiae, POH            | NA                  | NA                           |
| FA-23         | Tamil Nadu     | FANCA    | F      | NA        | NA              | No            | Thumb Abnormalities                          | MCH                            | HPOP, HP                  | NA                  | NA                           |
| FA-24/ FA-502 | Andhra Pradesh | FANCA    | M      | HCC       | Stanozolol/ BMT | No            | Thenar hypoplasia                            | NA                             | CAL, HP                   | NA                  | NA                           |
| FA-25         | Andhra Pradesh | FANCL    | M      | NA        | Stanozolol/ BMT | No            | SS                                           | NA                             | HP                        | Ectopic kidney      | NA                           |
| FA-26/ FA-530 | Tamil Nadu     | FANCG    | M      | NA        | Stanozolol      | Yes           | SS, Polydactyly, Clubbing                    | MCH                            | HPOP, HP                  | NA                  | NA                           |
| FA-27         | Andhra Pradesh | FANCA    | F      | NA        | Danazol         | Yes           | NA                                           | NA                             | HP                        | NA                  | NA                           |
| FA-27/19      | Tamil Nadu     | FANCA    | M      | NA        | Stanozolol      | Yes           | Triphalageal thumb                           | Hypertelorism, HAP             | HP                        | NA                  | Sister, 1 death at birth     |
| FA-28         | Tamil Nadu     | FANCA    | F      | NA        | Danazol         | Yes           | SS                                           | MCH                            | HP                        | NA                  | NA                           |
| FA-29         | Chattisgarh    | FANCD2   | F      | NA        | BMT             | Yes           | NA                                           | NA                             | NA                        | HSK                 | NA                           |
| FA-30/ FA-501 | Tamil Nadu     | FANCF    | M      | NA        | Stanozolol      | NA            | Thenar hypoplasia                            | LSE, MCH                       | HPOP, CAL, HP             | NA                  | NA                           |
| FA-30/19      | Andhra Pradesh | FANCL    | F      | NA        | Danazol         | Yes           | NA                                           | MCH                            | HP, HPOP                  | NA                  | NA                           |
| FA-31/ FA-514 | Andhra Pradesh | FANCA    | F      | NA        | Danazol         | No            | SS                                           | HAP                            | HP                        | NA                  | NA                           |
| FA-32         | Jharkhand      | FANCA    | M      | NA        | Stanozolol      | No            | SS                                           | LSE                            | HP, HPOP                  | NA                  | NA                           |
| FA-33         | Tamil Nadu     | FANCA    | M      | NA        | Stanozolol/ BMT | Yes           | NA                                           | NA                             | HP                        | NA                  | Sister with AA, brother died |
| FA-34         | Kerala         | FANCA    | M      | NA        | Stanozolol/ BMT | Yes           | SS                                           | TF                             | CAL, HP                   | NA                  | NA                           |
| FA-35         | Kerala         | FANCA    | M      | NA        | BMT             | NA            | TH, SD                                       | Depressed nasal bridge, MCH    | CAL                       | NA                  | NA                           |
| FA-36/ FA-526 | Andhra Pradesh | FANCG    | M      | NA        | Stanozolol      | Yes           | NA                                           | TF, ASE                        | CAL, HP                   | NA                  | NA                           |
| FA-36/19      | Tamil Nadu     | FANCG    | M      | AML       | Stanozolol      | No            | TH                                           | HAP, small mouth and eyes, ASE | HP, CAL                   | Small kidneys       | Sister                       |
| FA-37/19      | Tamil Nadu     | FANCG    | F      | MDS       | Danazol         | No            | NA                                           | HAP, small mouth and eyes, ASE | HP, CAL                   | NA                  | Brother                      |
| FA-38         | Maharashtra    | FANCG    | F      | NA        | BMT             | No            | Subtle thumb abnormality                     | NA                             | HP                        | NA                  | NA                           |
| FA-39 /FA-518 | Andhra Pradesh | FANCC    | M      | NA        | Stanozolol      | Yes           | Thenar hypoplasia                            | NA                             | HP                        | NA                  | NA                           |
| FA-49/19      | Andhra Pradesh | FANCL    | M      | DKC       | NA              | Yes           | SS                                           | NA                             | HP, HPOP, CAL             | Hypoplastic kidneys | NA                           |
| FA-511        | Andhra Pradesh | FANCA    | M      | NA        | Stanozolol/ BMT | Yes           | SST                                          | NA                             | HP, CAL                   | NA                  | Sibling died of FA-AML       |
| FA-513        | Andhra Pradesh | FANCA    | M      | NA        | Stanozolol      | Yes           | TH                                           | LSE                            | HP, CAL                   | NA                  | NA                           |
| FA-516        | West Bengal    | FANCA    | M      | NA        | Stanozolol      | Yes           | NA                                           | LSE, MCH                       | CAL                       | NA                  | NA                           |
| FA-517        | Kerala         | FANCC    | M      | NA        | Danazol/ BMT    | Yes           | TA, Ectrodactyly, Clinodactyly               | HAP, MOA, MCH                  | CAL                       | NA                  | NA                           |
| FA-519        | West Bengal    | FANCD2   | M      | NA        | Stanozolol      | No            | SS, Absent simian crease, TH                 | TF                             | HP                        | NA                  | NA                           |
| FA-521        | Andhra Pradesh | FANCA    | M      | NA        | Stanozolol      | Yes           | TH                                           | AE                             | HP                        | NA                  | NA                           |
| FA-523        | Kerala         | FANCL    | M      | NA        | Stanozolol      | No            | NA                                           | MCH                            | CAL, HP                   | NA                  | NA                           |
| FA-525        | Tamil Nadu     | FANCL    | M      | NA        | Stanozolol/ BMT | No            | Syndactyly, DPT                              | NA                             | HP, HPOP                  | NA                  | NA                           |
| FA-527        | Chattisgarh    | FANCC    | F      | NA        | Danazol/ BMT    | No            | SS, Clinodactyly                             | NA                             | HP                        | NA                  | NA                           |
| FA-528        | Haryana        | C17orf70 | F      | NA        | BMT             | No            | SS                                           | MCH                            | NA                        | NA                  | NA                           |
| FA-529        | Tamil Nadu     | FANCA    | F      | NA        | Danazol         | No            | SS, BT                                       | MCH                            | HP                        | NA                  | NA                           |

|            |                |       |   |         |                       |     |                                     |                                       |                     |                                    |                                     |
|------------|----------------|-------|---|---------|-----------------------|-----|-------------------------------------|---------------------------------------|---------------------|------------------------------------|-------------------------------------|
| FA-531     | Karnataka      | FANCG | M | NA      | BMT                   | Yes | Clinodactyly                        | NA                                    | HP, CAL             | ARP                                | NA                                  |
| FA-532     | Andhra Pradesh | FANCL | F | NA      | Danazol               | Yes | NA                                  | DF                                    | HP, HPOP            | NA                                 | NA                                  |
| FA-533     | Maharashtra    | FANCA | F | NA      | Danazol/ BMT          | No  | NA                                  | HAP, MGH                              | HP                  | NA                                 | NA                                  |
| FA-535     | Andhra Pradesh | FANCL | M | NA      | Stanozolol            | Yes | SS                                  | MGH                                   | HP                  | NA                                 | NA                                  |
| FA-538     | Andhra Pradesh | FANCL | M | NA      | Stanozolol            | NA  | SS, TH                              | MCH, HAP                              | CAL                 | NA                                 | NA                                  |
| FA-543     | Andhra Pradesh | FANCL | F | NA      | Danazol               | Yes | Nail dystrophy                      | HAP                                   | HPOP                | NA                                 | NA                                  |
| FA-544     | Andhra Pradesh | FANCA | M | NA      | Stanozolol            | NA  | Clinodactyly                        | LSE, HAP                              | HPOP, CAL, HP       | NA                                 | NA                                  |
| FA-547     | Karnataka      | FANCA | F | NA      | Danazol               | Yes | Skeletal deformity                  | MOA, DF, MGH                          | HPOP                | NA                                 | NA                                  |
| FA-548     | Kerala         | FANCL | M | NA      | Stanozolol            | No  | SS                                  | MCH, DF                               | HP, HPOP            | NA                                 | NA                                  |
| FA-549     | Bihar          | FANCA | M | NA      | Stanozolol            | No  | BT, Polydactyly                     | NA                                    | HP                  | NA                                 | NA                                  |
| FA-554     | Kerala         | FANCA | M | NA      | Stanozolol            | No  | SS, Bilateral clinodactyly          | NA                                    | CAL, HP, Pallor     | NA                                 | Sister                              |
| FA-556     | Karnataka      | FANCA | M | NA      | Stanozolol            | No  | NA                                  | NA                                    | HP                  | Kidney abnormalities               | NA                                  |
| FA-557     | Kerala         | FANCA | M | NA      | Stanozolol/ BMT       | No  | NA                                  | NA                                    | HP, HPOP            | NA                                 | NA                                  |
| FA-561     | Tamil Nadu     | FANCA | F | MDS     | Danazol/ BMT          | Yes | SS                                  | Hypertelorism                         | HP                  | NA                                 | NA                                  |
| FA-564     | Tamil Nadu     | FANCL | M | NA      | Stanozolol            | Yes | SS                                  | MOA                                   | COP, CAL            | NA                                 | NA                                  |
| FA-565     | West Bengal    | FANCA | M | MDS     | Stanozolol            | No  | Clinodactyly                        | MCH, MOA                              | CAL, Pallor         | NA                                 | NA                                  |
| FA-573     | Kerala         | FANCA | M | NA      | Stanozolol/ Metformin | No  | SS                                  | NA                                    | CAL                 | Hypogonadism                       | NA                                  |
| FA-581     | Andhra Pradesh | FANCA | M | NA      | Stanozolol/ BMT       | Yes | SS, TH                              | MCH, LSE, MOA                         | POH                 | NA                                 | NA                                  |
| FA-588     | Kerala         | FANCG | M | NA      | Stanozolol/ BMT       | No  | SS, Short neck, thumb abnormalities | MCH, hypertelorism                    | POH, HP             | NA                                 | NA                                  |
| FA-591     | Tamil Nadu     | FANCA | F | NA      | Danazol               | Yes | Thenar and hypothenar atrophy       | NA                                    | HP, CAL             | NA                                 | yes                                 |
| FA-592     | Andhra Pradesh | FANCA | F | NA      | Danazol/ BMT          | No  | SS                                  | NA                                    | POH, CAL            | NA                                 | NA                                  |
| FA-593     | Tamil Nadu     | FANCA | M | MDS     | Stanozolol            | Yes | TH (R), TA (L)                      | NA                                    | HP                  | NA                                 | NA                                  |
| FA-595     | Tamil Nadu     | FANCL | M | NA      | Stanozolol            | No  | NA                                  | NA                                    | CAL, HPOP           | NA                                 | Brother                             |
| FA-598     | Karnataka      | FANCG | M | NA      | Stanozolol/ BMT       | Yes | SS                                  | NA                                    | CAL                 | Atrophic left kidney               | NA                                  |
| FA-599     | Tamil Nadu     | FANCA | F | NA      | Danazol               | Yes | NA                                  | Small and closely set eyes, HAP       | CAL, HP             | kidney abnormalities               | NA                                  |
| FA-601     | Tamil Nadu     | FANCL | M | NA      | Danazol/ BMT          | No  | NA                                  | Oral leukoplakia, MCH                 | HP, HPOP, POH       | NA                                 | Brother                             |
| FA-614     | Andhra Pradesh | FANCA | M | NA      | Stanozolol/ BMT       | No  | SS, clinodactyly                    | HAP                                   | HPOP                | NA                                 | NA                                  |
| FA-622     | West Bengal    | FANCA | F | NA      | Danazol               | No  | NA                                  | NA                                    | HP                  | NA                                 | NA                                  |
| FA-629/18  | Gujrat         | FANCG | M | NA      | NA                    | No  | SS, TH                              | HAP, EF                               | NA                  | Absent kidney                      | NA                                  |
| FA-631/18  | Kerala         | FANCA | F | MDS     | Danazol               | No  | NA                                  | DF                                    | NA                  | NA                                 | Sister died during chemotherapy     |
| FA-636/18  | Karnataka      | FANCT | F | MDS/AML | NA                    | No  | SS, congenital kyphoscoliosis, SD   | MCH, TF                               | HP                  | Solitary kidney                    | NA                                  |
| FA-637/18  | Tamil Nadu     | FANCL | M | MDS     | BMT                   | No  | NA                                  | NA                                    | NA                  | Ectopic kidney                     | NA                                  |
| FA-638/18  | Andhra Pradesh | FANCL | M | NA      | Stanozolol            | No  | Bilateral clinodactyly, SST         | LSE, MOA                              | COP, HP, CAL        | NA                                 | NA                                  |
| FA-641/18  | Kerala         | FANCF | M | MDS     | BMT                   | No  | Hypoplasia of upper and lower limbs | NA                                    | HP, CAL             | NA                                 | NA                                  |
| FA-650/18  | Andhra Pradesh | FANCG | F | NA      | Danazol               | Yes | SS, TA                              | NA                                    | HP                  | NA                                 | NA                                  |
| FA-652/18  | West Bengal    | FANCA | F | NA      | Danazol               | Yes | NA                                  | DF                                    | NA                  | NA                                 | NA                                  |
| FA-659/18  | Tamil Nadu     | FANCA | M | NA      | Stanozolol/ BMT       | Yes | congenital TH, CTEV                 | MCH, LSE                              | POH, CAL            | Congenital acyanotic heart disease | NA                                  |
| FA-660/18  | Tamil Nadu     | FANCA | F | NA      | NA (Pregnant)         | Yes | Polydactyly                         | HAP                                   | HP                  | NA                                 | NA                                  |
| FA-665/18  | Kerala         | FANCL | F | NA      | Danazol               | Yes | SS, clinodactyly                    | MCH, LSE, HAP                         | CAL, COP            | NA                                 | NA                                  |
| FA-672/18  | Kerala         | FANCA | M | NA      | Danazol               | No  | BT                                  | HAP                                   | CAL                 | NA                                 | NA                                  |
| FA-674/18  | Kerala         | FANCA | M | NA      | Stanozolol            | No  | TH                                  | MCH                                   | Patches over body   | kidney abnormalities, ARP          | NA                                  |
| FA-675/18  | Kerala         | FANCL | F | NA      | Stanozolol/ BMT       | No  | NA                                  | MCH, EF                               | NA                  | NA                                 | NA                                  |
| O-117      | Tamil Nadu     | FANCA | F | NA      | Danazol/ BMT          | Yes | SS, emaciated                       | MCH, MOA, LSE, HAP, EF                | POH, HPOP           | NA                                 | NA                                  |
| O-123      | Kerala         | FANCL | F | NA      | Danazol               | No  | BT                                  | MCH                                   | POH, HPOP, CAL      | NA                                 | NA                                  |
| O-126      | Andhra Pradesh | FANCA | M | MDS-AML | Stanozolol/ BMT       | Yes | Simian crease in both hands         | LSE, hypertelorism                    | HP                  | NA                                 | NA                                  |
| FA-40      | Tamil Nadu     | FANCA | M | NA      | NA                    | Yes | NA                                  | TF                                    | CAL                 | kidney abnormalities               | NA                                  |
| FA-522     | Kerala         | FANCL | M | NA      | NA                    | No  | Thenar and hypothenar hypoplasia    | NA                                    | CAL, HP             | NA                                 | NA                                  |
| FA-541     | Tamil Nadu     | FANCA | F | NA      | BMT                   | Yes | NA                                  | NA                                    | NA                  | NA                                 | NA                                  |
| FA-542     | NA             | FANCA | F | NA      | NA                    | NA  | NA                                  | NA                                    | NA                  | NA                                 | NA                                  |
| FA-568     | Andhra Pradesh | FANCA | M | MDS     | BMT                   | No  | NA                                  | NA                                    | NA                  | NA                                 | Sibling died                        |
| FA-580     | Bihar          | FANCG | F | NA      | Danazol               | No  | NA                                  | NA                                    | NA                  | Ectopic kidney                     | NA                                  |
| FA-584     | Tamil Nadu     | FANCA | F | NA      | Danazol               | Yes | NA                                  | NA                                    | Pigmented tongue    | NA                                 | NA                                  |
| FA-646/18  | Andhra Pradesh | FANCA | F | NA      | Danazol/ BMT          | Yes | NA                                  | NA                                    | NA                  | Anorectal malformation             | Sister died with congenital anomaly |
| FP-23-P-11 | Andhra Pradesh | FANCA | M | NA      | Danazol               | No  | NA                                  | NA                                    | NA                  | Anorectal malformation             | NA                                  |
| P-177      | West Bengal    | FANCA | F | NA      | Danazol               | No  | NA                                  | Epicanthus                            | NA                  | NA                                 | NA                                  |
| P-603      | Andhra Pradesh | FANCL | M | NA      | Stanozolol            | Yes | Clinodactyly                        | LSE, HAP, depressed nasal bridge, MCH | Ichthyosis, CAL, HP | NA                                 | NA                                  |
| FA-04/20   | Kerala         | FANCA | F | NA      | Stanozolol/ BMT       | No  | NA                                  | NA                                    | NA                  | NA                                 | NA                                  |

|           |                |             |   |     |             |     |                                  |                                      |          |                                   |                        |
|-----------|----------------|-------------|---|-----|-------------|-----|----------------------------------|--------------------------------------|----------|-----------------------------------|------------------------|
| FA-06/20  | Telangana      | FANCA       | F | NA  | Danazol     | Yes | Polydactyly                      | HAP, EF                              | NA       | NA                                | NA                     |
| FA-10/20  | Andhra Pradesh | FANCA       | F | NA  | Danazol     | Yes | NA                               | MCH, HAP                             | HP, CAL  | NA                                | NA                     |
| FA-10/21  | Andhra Pradesh | FANCA       | F | NA  | Danazol     | Yes | Thenar and hypotherar hypoplasia | MCH, Small and closely set eyes, HAP | CAL      | NA                                | NA                     |
| FA-11/20  | West Bengal    | FANCA       | M | NA  | Stanozolol  | Yes | SS                               | MCH, TF, HAP                         | CAL      | NA                                | NA                     |
| FA-15/20  | Lakshadweep    | FANCG       | M | NA  | Stanozolol  | No  | SS                               | NA                                   | HP       | ARP                               | NA                     |
| FA-16/20  | Andhra Pradesh | FANCA       | F | MDS | Danazol     | No  | NA                               | NA                                   | NA       | NA                                | NA                     |
| FA-21/20  | Andhra Pradesh | FANCA       | F | MDS | BMT         | Yes | NA                               | MCH                                  | HP       | NA                                | NA                     |
| FA-5/21   | West Bengal    | FANCT       | M | MDS | Danazol     | No  | NA                               | NA                                   | NA       | NA                                | NA                     |
| FA-01/20  | Kerala         | FANCG       | M | NA  | Stanozolol  | Yes | Clinodactyly                     | MCH, MGH                             | NA       | Left ectopic kidney               | NA                     |
| FA-02/21  | West Bengal    | FANCA       | M | NA  | Stanozolol  | No  | SS                               | NA                                   | NA       | NA                                | NA                     |
| FA-08/19  | Andhra Pradesh | FANCA       | F | MDS | Danazol     | Yes | SS, Polydactyly                  | NA                                   | HP       | ongenital acyanotic heart disease | NA                     |
| FA-13/19  | Kerala         | FANCA       | F | NA  | Danazol     | No  | Polydactyly, Thumb anomalies     | MCH, HAP                             | CAL      | NA                                | NA                     |
| FA-18/21  | Tamil Nadu     | FANCA       | M | MDS | Stanozolol  | Yes | SS, TH                           | EF                                   | HP       | NA                                | NA                     |
| FA-21/21  | Kerala         | FANCA       | F | NA  | Danazol/BMT | No  | NA                               | NA                                   | HP       | NA                                | NA                     |
| FA-23/19  | Tamil Nadu     | FANCA       | M | NA  | Stanozolol  | Yes | SS                               | EF, HAP                              | NA       | NA                                | NA                     |
| FA-26/21  | Jharkhand      | FANCA       | M | NA  | NA          | Yes | Hypotherar wasting               | NA                                   | HP       | Anorectal malformation            | NA                     |
| FA-30/21  | Tamil Nadu     | UBE2T/FANCT | F | NA  | NA          | Yes | Polydactyly                      | NA                                   | HP       | HSK                               | NA                     |
| FA-31/21  | Odisha         | FANCA       | F | NA  | Danazol     | NA  | NA                               | EF, HAP                              | NA       | NA                                | NA                     |
| FA-32/19  | Kerala         | FANCA       | M | NA  | Stanozolol  | Yes | Musculoskeletal abnormalities    | Hypertelorism, MCH, HAP              | CAL      | NA                                | NA                     |
| FA-33/19  | Maharashtra    | FANCL       | M | NA  | Danazol     | No  | NA                               | NA                                   | HP, CAL  | Small testes                      | NA                     |
| FA-33/21  | Jharkhand      | FANCA       | M | NA  | NA          | Yes | NA                               | Fanconi facies                       | CAL      | NA                                | NA                     |
| FA-34/19  | Kerala         | FANCL       | M | NA  | Stanozolol  | No  | NA                               | NA                                   | HP       | NA                                | NA                     |
| FA-35/21  | Andhra Pradesh | FANCA       | F | NA  | Danazol     | Yes | Thenar hypoplasia                | NA                                   | NA       | NA                                | NA                     |
| FA-649/18 | West Bengal    | BRCA2       | M | AML | NA          | No  | Thumb Abnormalities              | MCH                                  | HP, HPOP | Wilms tumor                       | Sibling died of FA-AML |
| FA-12/22  | Andhra Pradesh | FANCL       | F | NA  | Danazol     | Yes | Clinodactyly                     | TF, MCH                              | HP       | Anorectal malformation            | NA                     |

**Skeletal abnormalities:** SS- Short stature; TH- Thumb hypoplasia; BT- Bifid thumb; SST- Short stubby toes; TA- Thumb aplasia; CTEV- Congenital talipes equinovarus; HSK- Horse shoe kidney; DPT- Distally placed thumb; ARP- absent radial pulse; SD- Sprengel's deformity

**Facial Dysmorphism:** DF- Dysmorphic Face; MCH- Microcephaly; MGH- Micrognathia; AE- Almond shaped eyes; Low set ears- LSE; High arched palate- HAP; Arched palate- AP; Elfin Facies- EF; TF- Triangular facies; Microphthalmia- MOA; ASE- Antemongoloid slant of eyes

**Skin changes:** HP- Hyperpigmentation; HPOP- Hypopigmentation; CAL- Café au lait; COP- Circum oral pigmentation; POH- Perioral hypopigmentation

**Other anomalies:** HSK- Horse-shoe kidney
